# Supplementary material for: The Disruption of Liver Metabolic Circadian Rhythms by a Cafeteria Diet Is Sex-Dependent in Fischer 344 Rats
Source: PubMed Central journal article supplement (PMC7230270; doi:10.3390/nu12041085), 2020-04-14
Supplement: nutrients-12-01085-s001.pdf [file nutrients-12-01085-s001.pdf]

## Supplementary Material

**The disruption of liver metabolism circadian rhythms by an obesogenic diet is sex-dependent in Fischer 344 rats.**

**Author: Hector Palacios-Jordan**

**Corresponding: Miguel A. Rodríguez**

**Supplementary table 1. Biometric parameters in both male and female Fischer 344 rats fed either standard or obesogenic diet for 9 weeks.**

| Biometric parameters    | Female                     |                            |                             |                            | Male                       |                             |                             |                             |
|-------------------------|----------------------------|----------------------------|-----------------------------|----------------------------|----------------------------|-----------------------------|-----------------------------|-----------------------------|
|                         | Standard                   |                            | Cafeteria                   |                            | Standard                   |                             | Cafeteria                   |                             |
|                         | ZT3                        | ZT15                       | ZT3                         | ZT15                       | ZT3                        | ZT15                        | ZT3                         | ZT15                        |
| Initial body weight (g) | 151.35 ± 2.58              | 154.15 ± 2.39              | 153 ± 2.8                   | 158.29 ± 2.19              | 228.48 ± 4.53              | 228.5 ± 9.63                | 207.46 ± 11.24              | 226.58 ± 2.45               |
| Final body weight (g)   | 201.25 ± 4.72 <sup>a</sup> | 203.75 ± 4.27 <sup>a</sup> | 262.81 ± 5.584 <sup>b</sup> | 260.69 ± 7.57 <sup>b</sup> | 354.81 ± 6.54 <sup>a</sup> | 349.63 ± 15.24 <sup>a</sup> | 418.5 ± 6.78 <sup>b</sup>   | 410.75 ± 4.68 <sup>b</sup>  |
| Caloric intake (KJ)     | 158.06 ± 2.52 <sup>a</sup> | 158.06 ± 2.42 <sup>a</sup> | 511.99 ± 39.11 <sup>b</sup> | 449.34 ± 7.39 <sup>b</sup> | 253.75 ± 4.04 <sup>a</sup> | 253.5 ± 7.48 <sup>a</sup>   | 664.20 ± 14.86 <sup>b</sup> | 630.89 ± 23.15 <sup>b</sup> |

Female and male F344 rats were fed either a standard or obesogenic diet during 9 weeks. Data are expressed as the mean ± SEM (n = 8). One-way ANOVA and Duncan's post hoc tests were performed to compare differences between groups. Significant differences are represented by different letters (a, b). P-value < 0.05 were considered statistically significant.

**Supplementary Table 2. Concentration of representative aqueous liver metabolites analysed by Nuclear Magnetic Resonance in female and male Fisher 344 rats fed with a chow diet and sacrificed at two different times, ZT3 or ZT15.**

| Aqueous metabolites concentration (AU) | Female                    |                            | Male                      |                           |
|----------------------------------------|---------------------------|----------------------------|---------------------------|---------------------------|
|                                        | ZT3                       | ZT15                       | ZT3                       | ZT15                      |
| 3-Hydroxybutyrate                      | 0.16 ± 0.01 <sup>a</sup>  | 0.2 ± 0.03 <sup>a</sup>    | 0.22 ± 0.01 <sup>a</sup>  | 0.32 ± 0.05 <sup>b</sup>  |
| Formate                                | 0.04 ± 0.003              | 0.05 ± 0.003               | 0.05 ± 0.003              | 0.05 ± 0.003              |
| Fumarate                               | 0.08 ± 0.01 <sup>a</sup>  | 0.05 ± 0.004 <sup>bc</sup> | 0.06 ± 0.003 <sup>b</sup> | 0.04 ± 0.004 <sup>c</sup> |
| Glucose 6-Phosphate                    | 15.68 ± 1.3 <sup>ab</sup> | 14.73 ± 1.3 <sup>b</sup>   | 20.22 ± 0.8 <sup>c</sup>  | 18.38 ± 1.2 <sup>ac</sup> |
| Lactate                                | 6.67 ± 0.7                | 6.81 ± 1.1                 | 6.09 ± 0.7                | 5.80 ± 0.7                |
| Pyruvate                               | 0.04 ± 0.02               | 0.05 ± 0.02                | 0.07 ± 0.01               | 0.03 ± 0.01               |
| Succinate                              | 0.77 ± 0.1                | 0.77 ± 0.1                 | 0.88 ± 0.1                | 0.98 ± 0.1                |
| Acetate                                | 0.23 ± 0.02 <sup>a</sup>  | 0.26 ± 0.02 <sup>a</sup>   | 0.74 ± 0.2 <sup>b</sup>   | 0.87 ± 0.1 <sup>b</sup>   |
| Choline                                | 0.08 ± 0.01 <sup>a</sup>  | 0.20 ± 0.03 <sup>b</sup>   | 0.07 ± 0.01 <sup>a</sup>  | 0.18 ± 0.02 <sup>b</sup>  |
| Betaine                                | 2.29 ± 0.2 <sup>a</sup>   | 2.56 ± 0.3 <sup>a</sup>    | 1.28 ± 0.1 <sup>b</sup>   | 1.55 ± 0.1 <sup>b</sup>   |
| Creatine                               | 0.25 ± 0.02               | 0.22 ± 0.01                | 0.21 ± 0.01               | 0.19 ± 0.01               |
| Creatine Phosphate                     | 0.05 ± 0.002              | 0.06 ± 0.01                | 0.04 ± 0.001              | 0.04 ± 0.003              |
| Creatinine                             | 0.02 ± 0.002 <sup>a</sup> | 0.03 ± 0.003 <sup>a</sup>  | 0.03 ± 0.003 <sup>a</sup> | 0.04 ± 0.01 <sup>b</sup>  |
| NAD <sup>+</sup> /NADH                 | 0.17 ± 0.01               | 0.16 ± 0.02                | 0.19 ± 0.03               | 0.22 ± 0.02               |
| Niacinamide                            | 0.20 ± 0.01               | 0.19 ± 0.01                | 0.21 ± 0.01               | 0.21 ± 0.01               |
| Inosine                                | 0.69 ± 0.1 <sup>a</sup>   | 0.70 ± 0.1 <sup>a</sup>    | 1.56 ± 0.1 <sup>b</sup>   | 1.32 ± 0.2 <sup>c</sup>   |
| Alanine                                | 2.64 ± 0.1 <sup>a</sup>   | 2.24 ± 0.2 <sup>a</sup>    | 3.40 ± 0.2 <sup>b</sup>   | 2.52 ± 0.2 <sup>a</sup>   |
| Glutamate                              | 0.96 ± 0.1                | 0.99 ± 0.1                 | 1.31 ± 0.1                | 1.21 ± 0.1                |
| Glutamine                              | 3.30 ± 0.2                | 4.11 ± 0.4                 | 3.36 ± 0.2                | 3.92 ± 0.3                |
| Glycine                                | 1.44 ± 0.1 <sup>a</sup>   | 1.38 ± 0.1 <sup>a</sup>    | 1.04 ± 0.1 <sup>b</sup>   | 0.99 ± 0.1 <sup>b</sup>   |
| Histidine                              | 0.04 ± 0.002              | 0.05 ± 0.003               | 0.05 ± 0.004              | 0.04 ± 0.003              |
| Isoleucine                             | 0.19 ± 0.01 <sup>a</sup>  | 0.22 ± 0.01 <sup>b</sup>   | 0.19 ± 0.01 <sup>ab</sup> | 0.22 ± 0.01 <sup>b</sup>  |
| Leucine                                | 0.60 ± 0.02               | 0.70 ± 0.1                 | 0.59 ± 0.02               | 0.68 ± 0.03               |
| Lysine                                 | 0.44 ± 0.02 <sup>ab</sup> | 0.64 ± 0.1 <sup>c</sup>    | 0.38 ± 0.01 <sup>a</sup>  | 0.50 ± 0.03 <sup>b</sup>  |
| Phenylalanine                          | 0.38 ± 0.02               | 0.40 ± 0.03                | 0.34 ± 0.02               | 0.38 ± 0.01               |
| Tyrosine                               | 0.13 ± 0.01               | 0.12 ± 0.01                | 0.15 ± 0.004              | 0.17 ± 0.01               |
| Valine                                 | 0.28 ± 0.01               | 0.32 ± 0.02                | 0.30 ± 0.01               | 0.35 ± 0.02               |
| Ascorbate                              | 0.56 ± 0.02 <sup>a</sup>  | 0.47 ± 0.04 <sup>b</sup>   | 0.65 ± 0.02 <sup>c</sup>  | 0.54 ± 0.03 <sup>ab</sup> |

Standard female and male Fischer 344 rats were sacrificed at ZT3 and ZT15 fed with a chow diet for 9 weeks. Data are expressed as the mean ± SEM (n=8). All the metabolites were obtained by performing a nuclear magnetic resonance (NMR) analysis. One-way ANOVA and Duncan's post hoc test were performed to compare the values between groups and significant differences were represented with letters (a, b, c). P-value < 0.05 were considered statistically significant.

**Supplementary Table 3. Concentration of representative lipid liver metabolites analysed by Nuclear Magnetic Resonance in female and male Fisher 344 rats fed with a chow diet and sacrificed at two different times, ZT3 or ZT15.**

| Metabolites concentration (AU) | Female                   |                           | Male                      |                          |
|--------------------------------|--------------------------|---------------------------|---------------------------|--------------------------|
|                                | ZT3                      | ZT15                      | ZT3                       | ZT15                     |
| Total cholesterol              | 3.73 ± 0.1               | 3.78 ± 0.1                | 3.55 ± 0.1                | 3.86 ± 0.2               |
| Free cholesterol               | 3.58 ± 0.1               | 3.65 ± 0.1                | 3.40 ± 0.1                | 3.44 ± 0.2               |
| Esterified cholesterol         | 1.49 ± 0.1               | 1.55 ± 0.1                | 0.26 ± 0.01               | 0.30 ± 0.1               |
| Triglycerides                  | 1.91 ± 0.2 <sup>a</sup>  | 1.03 ± 0.1 <sup>b</sup>   | 4.92 ± 1.4 <sup>c</sup>   | 5.456 ± 2.1 <sup>c</sup> |
| Diglycerides                   | 2.68 ± 0.1 <sup>a</sup>  | 2.36 ± 0.1 <sup>b</sup>   | 0.81 ± 0.03 <sup>c</sup>  | 0.80 ± 0.1 <sup>c</sup>  |
| Monoglycerides                 | 1.12 ± 0.2               | 0.85 ± 0.1                | 0.65 ± 0.02               | 0.71 ± 0.04              |
| Total phospholipids            | 15.15 ± 0.4 <sup>a</sup> | 16.15 ± 0.6 <sup>ab</sup> | 17.84 ± 0.2 <sup>bc</sup> | 18.32 ± 0.9 <sup>c</sup> |
| Phosphatidylethanolamine       | 7.05 ± 0.2               | 7.46 ± 0.2                | 7.06 ± 0.1                | 7.94 ± 0.2               |
| Phosphatidylserine             | 0.23 ± 0.01 <sup>a</sup> | 0.23 ± 0.01 <sup>a</sup>  | 0.17 ± 0.01 <sup>b</sup>  | 0.17 ± 0.01 <sup>b</sup> |
| Phosphatidylcholine            | 14.54 ± 0.3 <sup>a</sup> | 15.32 ± 0.5 <sup>ab</sup> | 15.4 ± <sup>ab</sup>      | 16.3 ± 0.24 <sup>b</sup> |
| Sphingomyelin                  | 0.95 ± 0.02 <sup>a</sup> | 0.98 ± 0.04 <sup>a</sup>  | 1.1 ± 0.03 <sup>a</sup>   | 1.18 ± 0.1 <sup>b</sup>  |
| Plasmalogen                    | 0.50 ± 0.03 <sup>a</sup> | 0.53 ± 0.03 <sup>a</sup>  | 0.41 ± 0.02 <sup>b</sup>  | 0.59 ± 0.1 <sup>a</sup>  |
| Omega-3                        | 5.00 ± 0.1 <sup>a</sup>  | 5.48 ± 0.2 <sup>b</sup>   | 4.40 ± 0.1 <sup>c</sup>   | 4.66 ± 0.3 <sup>bc</sup> |
| ARA+EPA                        | 8.26 ± 0.4 <sup>ab</sup> | 9.05 ± 0.4 <sup>b</sup>   | 6.88 ± 0.2 <sup>c</sup>   | 7.56 ± 0.6 <sup>ac</sup> |
| Oleic acid                     | 9.94 ± 0.7               | 8.08 ± 0.3                | 14.47 ± 2.2               | 14.61 ± 3.5              |
| DHA                            | 3.10 ± 0.1 <sup>a</sup>  | 3.49 ± 0.2 <sup>b</sup>   | 2.81 ± 0.1 <sup>a</sup>   | 3.10 ± 0.3 <sup>a</sup>  |
| Linoleic acid                  | 2.80 ± 0.2 <sup>a</sup>  | 2.41 ± 0.2 <sup>a</sup>   | 7.16 ± 0.8 <sup>b</sup>   | 6.65 ± 0.5 <sup>b</sup>  |

Standard female and male Fischer 344 rats were sacrificed at ZT3 and ZT15 fed with a chow diet for 9 weeks. Data are expressed as the mean ± SEM (n=8). All the metabolites were obtained by performing a nuclear magnetic resonance (NMR) analysis. One-way ANOVA and Duncan's post hoc test were performed to compare the values between groups and significant differences were represented with letters (a, b, c). P-value < 0.05 were considered statistically significant.

**Supplementary Table 4. Concentration of representative aqueous liver metabolites analysed by Nuclear Magnetic Resonance in female and male Fisher 344 rats fed with a cafeteria diet and sacrificed at two different times, ZT3 or ZT15.**

| Metabolites concentration (AU) | Female                    |                            | Male                      |                           |
|--------------------------------|---------------------------|----------------------------|---------------------------|---------------------------|
|                                | ZT3                       | ZT15                       | ZT3                       | ZT15                      |
| 3-Hydroxybutyrate              | 0.16 ± 0.01 <sup>a</sup>  | 0.2 ± 0.03 <sup>a</sup>    | 0.22 ± 0.01 <sup>a</sup>  | 0.32 ± 0.05 <sup>b</sup>  |
| Formate                        | 0.04 ± 0.003              | 0.05 ± 0.003               | 0.05 ± 0.003              | 0.05 ± 0.003              |
| Fumarate                       | 0.08 ± 0.01 <sup>a</sup>  | 0.05 ± 0.004 <sup>bc</sup> | 0.06 ± 0.003 <sup>b</sup> | 0.04 ± 0.004 <sup>c</sup> |
| Glucose 6-Phosphate            | 15.68 ± 1.3 <sup>ab</sup> | 14.73 ± 1.3 <sup>b</sup>   | 20.22 ± 0.8 <sup>c</sup>  | 18.38 ± 1.2 <sup>ac</sup> |
| Lactate                        | 6.67 ± 0.7                | 6.81 ± 1.1                 | 6.09 ± 0.7                | 5.80 ± 0.7                |
| Pyruvate                       | 0.04 ± 0.02               | 0.05 ± 0.02                | 0.07 ± 0.01               | 0.03 ± 0.01               |
| Succinate                      | 0.77 ± 0.1                | 0.77 ± 0.1                 | 0.88 ± 0.1                | 0.98 ± 0.1                |
| Acetate                        | 0.23 ± 0.02 <sup>a</sup>  | 0.26 ± 0.02 <sup>a</sup>   | 0.74 ± 0.2 <sup>b</sup>   | 0.87 ± 0.1 <sup>b</sup>   |
| Choline                        | 0.08 ± 0.01 <sup>a</sup>  | 0.20 ± 0.03 <sup>b</sup>   | 0.07 ± 0.01 <sup>a</sup>  | 0.18 ± 0.02 <sup>b</sup>  |
| Betaine                        | 2.29 ± 0.2 <sup>a</sup>   | 2.56 ± 0.3 <sup>a</sup>    | 1.28 ± 0.1 <sup>b</sup>   | 1.55 ± 0.1 <sup>b</sup>   |
| Creatine                       | 0.25 ± 0.02               | 0.22 ± 0.01                | 0.21 ± 0.01               | 0.19 ± 0.01               |
| Creatine Phosphate             | 0.05 ± 0.002              | 0.06 ± 0.01                | 0.04 ± 0.001              | 0.04 ± 0.003              |
| Creatinine                     | 0.02 ± 0.002 <sup>a</sup> | 0.03 ± 0.003 <sup>a</sup>  | 0.03 ± 0.003 <sup>a</sup> | 0.04 ± 0.01 <sup>b</sup>  |
| NAD <sup>+</sup> /NADH         | 0.17 ± 0.01               | 0.16 ± 0.02                | 0.19 ± 0.03               | 0.22 ± 0.02               |
| Niacinamide                    | 0.20 ± 0.01               | 0.19 ± 0.01                | 0.21 ± 0.01               | 0.21 ± 0.01               |
| Inosine                        | 0.69 ± 0.1 <sup>a</sup>   | 0.70 ± 0.1 <sup>a</sup>    | 1.56 ± 0.1 <sup>b</sup>   | 1.32 ± 0.2 <sup>c</sup>   |
| Alanine                        | 2.64 ± 0.1 <sup>a</sup>   | 2.24 ± 0.2 <sup>a</sup>    | 3.40 ± 0.2 <sup>b</sup>   | 2.52 ± 0.2 <sup>a</sup>   |
| Glutamate                      | 0.96 ± 0.1                | 0.99 ± 0.1                 | 1.31 ± 0.1                | 1.21 ± 0.1                |
| Glutamine                      | 3.30 ± 0.2                | 4.11 ± 0.4                 | 3.36 ± 0.2                | 3.92 ± 0.3                |
| Glycine                        | 1.44 ± 0.1 <sup>a</sup>   | 1.38 ± 0.1 <sup>a</sup>    | 1.04 ± 0.1 <sup>b</sup>   | 0.99 ± 0.1 <sup>b</sup>   |
| Histidine                      | 0.04 ± 0.002              | 0.05 ± 0.003               | 0.05 ± 0.004              | 0.04 ± 0.003              |
| Isoleucine                     | 0.19 ± 0.01 <sup>a</sup>  | 0.22 ± 0.01 <sup>b</sup>   | 0.19 ± 0.01 <sup>ab</sup> | 0.22 ± 0.01 <sup>b</sup>  |
| Leucine                        | 0.60 ± 0.02               | 0.70 ± 0.1                 | 0.59 ± 0.02               | 0.68 ± 0.03               |
| Lysine                         | 0.44 ± 0.02 <sup>ab</sup> | 0.64 ± 0.1 <sup>c</sup>    | 0.38 ± 0.01 <sup>a</sup>  | 0.50 ± 0.03 <sup>b</sup>  |
| Pehnylalanine                  | 0.38 ± 0.02               | 0.40 ± 0.03                | 0.34 ± 0.02               | 0.38 ± 0.01               |
| Tyrosine                       | 0.13 ± 0.01               | 0.12 ± 0.01                | 0.15 ± 0.004              | 0.17 ± 0.01               |
| Valine                         | 0.28 ± 0.01               | 0.32 ± 0.02                | 0.30 ± 0.01               | 0.35 ± 0.02               |
| Ascorbate                      | 0.56 ± 0.02 <sup>a</sup>  | 0.47 ± 0.04 <sup>b</sup>   | 0.65 ± 0.02 <sup>c</sup>  | 0.54 ± 0.03 <sup>ab</sup> |

Cafeteria female and male Fischer 344 rats were sacrificed at ZT3 and ZT15 fed with a chow diet for 9 weeks. Data are expressed as the mean ± SEM (n=8). All the metabolites were obtained by performing a nuclear magnetic resonance (NMR) analysis. One-way ANOVA and Duncan's post hoc test were performed to compare the values between groups and significant differences were represented with letters (a, b, c). P-value < 0.05 were considered statistically significant.

**Supplementary Table 5. Concentration of representative lipid liver metabolites analysed by Nuclear Magnetic Resonance in female and male Fisher 344 rats fed with a cafeteria diet and sacrificed at two different times, ZT3 or ZT15.**

| Metabolites concentration (AU) | Female                   |                           | Male                      |                          |
|--------------------------------|--------------------------|---------------------------|---------------------------|--------------------------|
|                                | ZT3                      | ZT15                      | ZT3                       | ZT15                     |
| Total cholesterol              | 3.73 ± 0.1               | 3.78 ± 0.1                | 3.55 ± 0.1                | 3.86 ± 0.2               |
| Free cholesterol               | 3.58 ± 0.1               | 3.65 ± 0.1                | 3.40 ± 0.1                | 3.44 ± 0.2               |
| Esterified cholesterol         | 1.49 ± 0.1               | 1.55 ± 0.1                | 0.26 ± 0.01               | 0.30 ± 0.1               |
| Tryglicerides                  | 1.91 ± 0.2 <sup>a</sup>  | 1.03 ± 0.1 <sup>b</sup>   | 4.92 ± 1.4 <sup>c</sup>   | 5.456 ± 2.1 <sup>c</sup> |
| Diglycerides                   | 2.68 ± 0.1 <sup>a</sup>  | 2.36 ± 0.1 <sup>b</sup>   | 0.81 ± 0.03 <sup>c</sup>  | 0.80 ± 0.1 <sup>c</sup>  |
| Monoglycerides                 | 1.12 ± 0.2               | 0.85 ± 0.1                | 0.65 ± 0.02               | 0.71 ± 0.04              |
| Total phospholipids            | 15.15 ± 0.4 <sup>a</sup> | 16.15 ± 0.6 <sup>ab</sup> | 17.84 ± 0.2 <sup>bc</sup> | 18.32 ± 0.9 <sup>c</sup> |
| Phosphatidylethanolamine       | 7.05 ± 0.2               | 7.46 ± 0.2                | 7.06 ± 0.1                | 7.94 ± 0.2               |
| Phosphatidylserine             | 0.23 ± 0.01 <sup>a</sup> | 0.23 ± 0.01 <sup>a</sup>  | 0.17 ± 0.01 <sup>b</sup>  | 0.17 ± 0.01 <sup>b</sup> |
| Phosphatidylcholine            | 14.54 ± 0.3 <sup>a</sup> | 15.32 ± 0.5 <sup>ab</sup> | 15.4 ± <sup>ab</sup>      | 16.3 ± 0.24 <sup>b</sup> |
| Sphingomyelin                  | 0.95 ± 0.02 <sup>a</sup> | 0.98 ± 0.04 <sup>a</sup>  | 1.1 ± 0.03 <sup>a</sup>   | 1.18 ± 0.1 <sup>b</sup>  |
| Plasmalogen                    | 0.50 ± 0.03 <sup>a</sup> | 0.53 ± 0.03 <sup>a</sup>  | 0.41 ± 0.02 <sup>b</sup>  | 0.59 ± 0.1 <sup>a</sup>  |
| Omega-3                        | 5.00 ± 0.1 <sup>a</sup>  | 5.48 ± 0.2 <sup>b</sup>   | 4.40 ± 0.1 <sup>c</sup>   | 4.66 ± 0.3 <sup>bc</sup> |
| ARA+EPA                        | 8.26 ± 0.4 <sup>ab</sup> | 9.05 ± 0.4 <sup>b</sup>   | 6.88 ± 0.2 <sup>c</sup>   | 7.56 ± 0.6 <sup>ac</sup> |
| Oleic acid                     | 9.94 ± 0.7               | 8.08 ± 0.3                | 14.47 ± 2.2               | 14.61 ± 3.5              |
| DHA                            | 3.10 ± 0.1 <sup>a</sup>  | 3.49 ± 0.2 <sup>b</sup>   | 2.81 ± 0.1 <sup>a</sup>   | 3.10 ± 0.3 <sup>a</sup>  |
| Linoleic acid                  | 2.80 ± 0.2 <sup>a</sup>  | 2.41 ± 0.2 <sup>a</sup>   | 7.16 ± 0.8 <sup>b</sup>   | 6.65 ± 0.5 <sup>b</sup>  |

Cafeteria female and male Fischer 344 rats were sacrificed at ZT3 and ZT15 fed with a chow diet for 9 weeks. Data are expressed as the mean ± SEM (n=8). All the metabolites were obtained by performing a nuclear magnetic resonance (NMR) analysis. One-way ANOVA and Duncan's post hoc test were performed to compare the values between groups and significant differences were represented with letters (a, b, c). P-value < 0.05 were considered statistically significant.
